# Supplementary material for: Association between the vaginal microbiome and high-risk human papillomavirus infection in pregnant Chinese women
Source: PubMed Central journal article supplement (PMC6669982; doi:10.1186/s12879-019-4279-6), 2019-08-01

**Figure S2: Heat map of relative abundance for the 20 most abundant bacterial genus found in the vaginal bacterial communities of 4 groups**

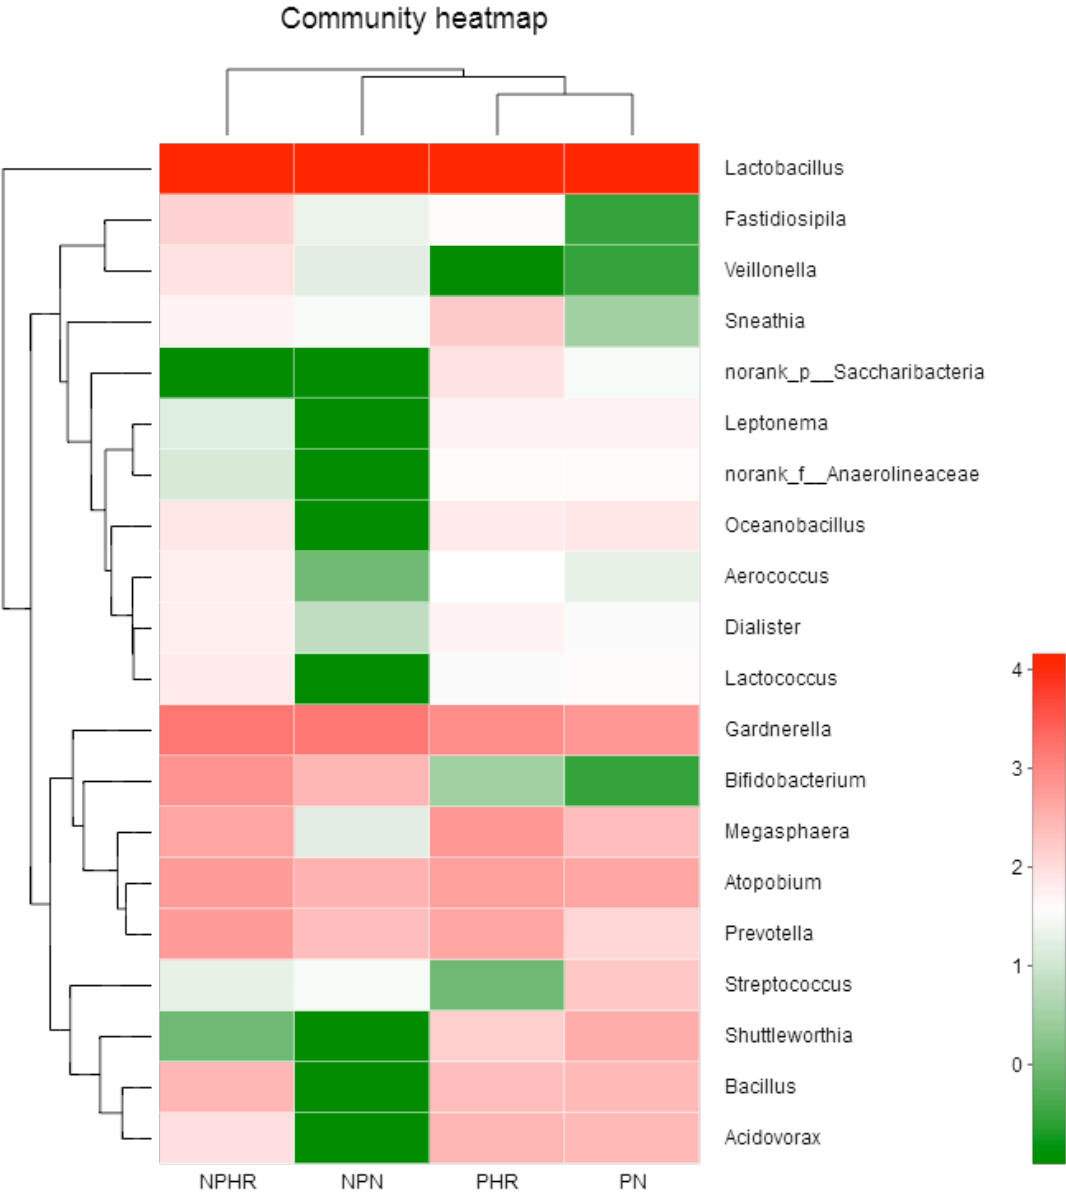

Supplement: 12879_2019_4279_MOESM6_ESM.pdf [file 12879_2019_4279_MOESM6_ESM.pdf]
