# Supplementary material for: Association between the vaginal microbiome and high-risk human papillomavirus infection in pregnant Chinese women
Source: Springer Nature journal article supplement (doi:10.1186/s12879-019-4279-6), 2019-08-01

**Figure S1: Heat map of relative abundance for the 22 most abundant bacterial phyla found in the vaginal bacterial communities of 4 groups**

Community heatmap

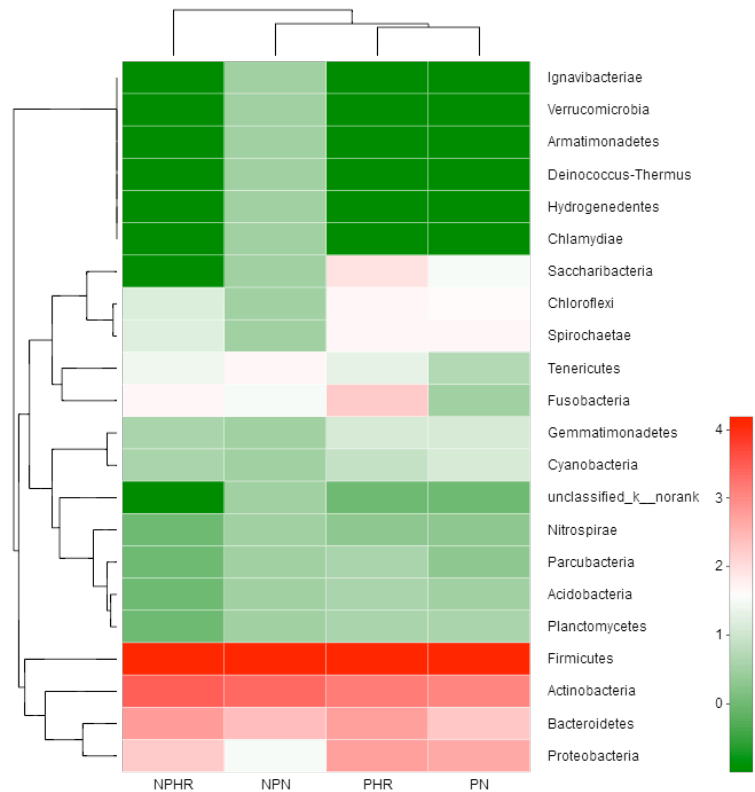

Supplement: MOESM5 [file 17030960]
